# Supplementary material
Source: publisher site journal article supplement (https://www.spandidos-publications.com/8666/downloadSupplementary)

Figure S1. Effect of Fer-1 on reversing ARID3A knockdown-induced ferroptotic changes in breast cancer cells. Comparison of (A) cell viability, (B) MDA levels, (C) ROS levels and (D)  $Fe^{2+}$  levels among numerous groups, including the siNC, siARID3A and siARID3A + Fer-1 groups, in breast cancer cell lines. Scale bar, 50  $\mu m$ . \* $P < 0.05$ , \*\* $P < 0.01$  and \*\*\* $P < 0.001$ . ARID3A, AT-rich interaction domain 3A;  $Fe^{2+}$ , ferrous iron; MDA, malondialdehyde; NC, negative control; ROS, reactive oxygen species; si, small interfering RNA; Fer-1, ferrostatin-1; ns, not significant.

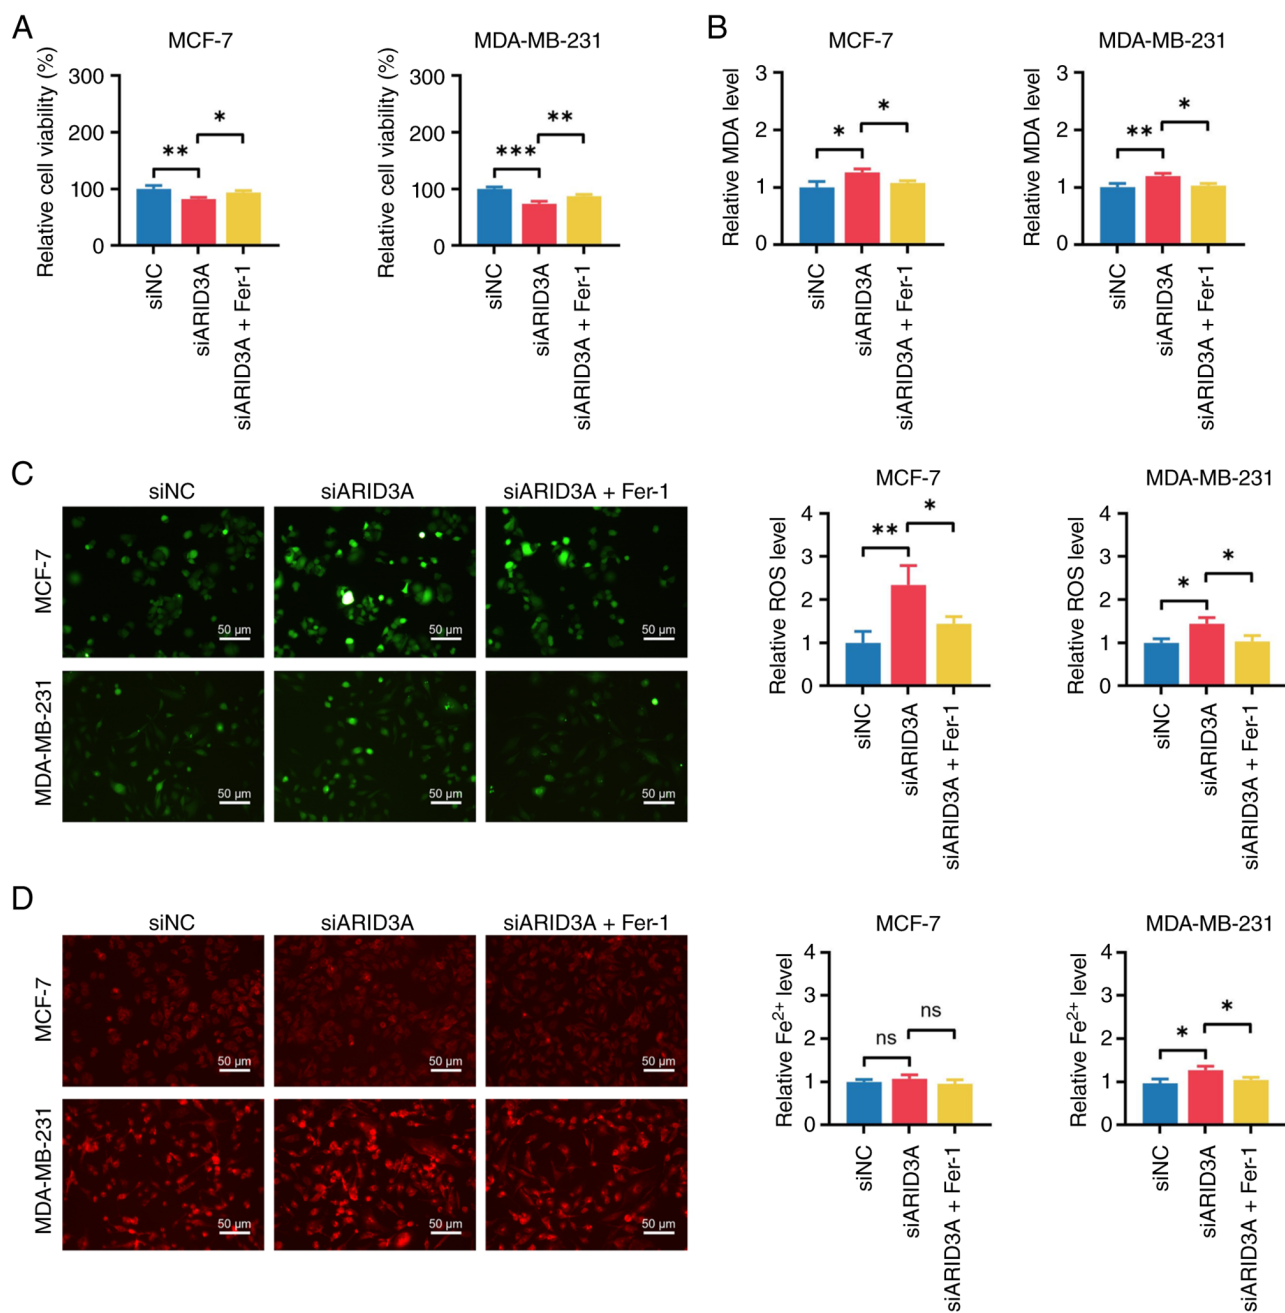

Supplement: Supplementary file 1 [file downloadSupplementary]
